# Supplementary material
Source: PubMed Central journal article supplement (PMC2628516)
Supplement: 11999_2008_650_MOESM2_ESM.pdf [file 11999_2008_650_MOESM2_ESM.pdf]

## Overview

Gender-Specific Knee Replacements:  
A Technology Overview

## Gender-Specific Knee Replacement

## Work Group:

E. Anthony Rankin, MD (Chair)  
 Mathias Bostrom, MD  
 William Hozack, MD  
 Joshua J. Jacobs, MD  
 Joseph C. McCarthy, MD  
 Mary I. O'Connor, MD  
 Stephen B. Trippel, MD  
 Charles Turkelson, PhD  
 (Methodologist and Staff Liaison)

The Overview was approved by the AAOS Board of Directors.

Dr. Rankin serves as board member, owner, officer, or committee member for the J. Robert Gladden Orthopaedic Society and serves on the editorial board of *Orthopedics*. Dr. Bostrom serves as board member, owner, officer, or committee member for the International Society for Fracture Repair, Orthopaedic Research Society, and National Institutes of Health; serves on the editorial board of the *Hospital for Special Surgery Journal*; and is a paid consultant for and receives research support from Smith & Nephew and Orthovita. Dr. Hozack serves on the editorial board of the *Journal of Arthroplasty*. Dr. Jacobs serves as board member, owner, officer, or committee member for the Orthopaedic Research Society; National Institute of Arthritis, Musculoskeletal and Skin Disease; US Bone and Joint Decade; and the Orthopaedic Research and Education Foundation; serves on the editorial boards of *Arthritis and Rheumatism* and the *Journal of Orthopaedic Research*; is a member of a speakers bureau or has made paid presentations on behalf of Zimmer; is a paid consultant for IsoTis Orthobiologics, Medtronic Sofamor Danek, Spinal Motion, Wright Medical Technology, Zimmer, and Advanced Spine Technologies; has received research or institutional support from Advanced Spine Technologies, Medtronic Sofamor Danek, Spinal Motion, Wright Medical Technology, and Zimmer; and has received other financial or material support from *Arthritis and Rheumatism* and Taylor & Francis. Dr. McCarthy serves as board member, owner, officer, or committee member for the American Association of Hip and Knee Surgeons, Association of Bone and Joint Surgeons, Hip Society, Orthopaedic Research and Education Foundation, and American Academy of Orthopaedic Surgeons; has received royalties from Arthrex, Innomed, and Stryker; is a member of a speakers bureau or has made paid presentations on behalf of INDICO; is a paid consultant for Stryker; and has received research or institutional support from Biomet and Zimmer. Dr. O'Connor serves as board member, owner, officer, or committee member for the American Association of Hip and Knee Surgeons, Ruth Jackson Orthopaedic Society, and Association of Bone and Joint Surgeons; serves on the editorial boards of *Clinical Orthopaedics and Related Research* and the *Journal of Arthroplasty*; has received royalties from DePuy and Zimmer; and has received research or institutional support from DePuy and Zimmer. Dr. Trippel has received miscellaneous nonincome support from Zimmer and serves as a consultant to Zimmer. Dr. Turkelson has not received anything of value from and does not own stock in a commercial company or institution related directly or indirectly to the subject of the Overview.

*J Am Acad Orthop Surg* 2008;16:63-67

Copyright 2008 by the American Academy of Orthopaedic Surgeons.

This Technology Overview was prepared using systematic review methodology and summarizes the findings of studies published as of November 2006 on gender-specific knee replacements. As a summary, this document does not make recommendations for or against the use of gender-specific knee replacements. It should not be construed as an official position of the American Academy of Orthopaedic Surgeons (Academy). Readers are encouraged to consider the information presented in this document and reach their own conclusions about gender-specific knees. The Academy has developed and is providing this Technology Overview as an educational tool. Patient care and treatment should always be based on a clinician's independent medical judgment given the individual clinical circumstances.

### Are There Gender-Specific Knee Anatomic Differences?

Differences in bony anatomy have been well documented between male and female knees.<sup>1</sup> Men have larger femurs than women (anterior-posterior height, transepicondylar width, height of the lateral and medial condyles).<sup>2,3</sup> Furthermore, for the same anterior-posterior dimension of the distal femur, women have a narrower medial-lateral width.<sup>2-4</sup> Rotatory differences exist, with the trochlear groove rotated somewhat externally relative to the epicondylar axis in females and somewhat internally in males.<sup>2</sup>

Anatomic differences in the patellofemoral joint are also present between males and females. Females have a larger Q angle,<sup>1,5,6</sup> larger ratio between the length of the patellar tendon and the greatest diagonal length of the patella on a lateral knee

radiograph (patella alta), and a more negative congruence angle (indicating that the lowest portion of the patella is more medial relative to a line bisecting the sulcus angle).<sup>5</sup> While women have higher average Q angles as compared to men and a higher minimum Q angle, maximum values for Q angles do not differ greatly between the sexes.<sup>6</sup> Of note is that men and women of the same height have similar Q angles and taller people have slightly lower Q angles. Thus the higher average Q angle in women as compared to men may be related to the larger overall height of men compared to women.<sup>7</sup>

In addition to anatomic differences, patellofemoral joint biomechanics varies between sexes. Male cadaveric specimens had greater patellofemoral contact area as compared to female specimens at knee flexion angles greater than 30°.<sup>8</sup>

This is logical given the larger size of the patella in males as compared to females. However, mean patellofemoral contact pressures were significantly increased in females as compared to males at 0° and 30° of knee flexion, and peak pressures were statistically significantly higher in women at 0°, 30° and 60° of knee flexion.<sup>8</sup>

Difference in soft-tissue characteristics, physical activities, and psychological makeup have also been discussed by some relative to sex differences but are beyond the scope of this Overview.

### Findings of Published Studies

We used systematic processes to locate published studies relevant to this topic. These processes began with the framing of two key questions, which appear below. We next developed article inclusion/

## Appendix 1

### Inclusion/Exclusion Criteria

We used the following criteria to determine whether studies should be included in this systematic review:

1. Article must be a full report and not a meeting abstract. Meeting abstracts do not contain sufficient information to allow for complete evaluation of study design and conduct. Further, many abstracts are never published as full reports.
2. Article must be published in English. Translation costs are prohibitive.
3. Study must be of humans.
4. Article must present results in quantitative fashion.
5. Studies of unicompartmental knee replacements are excluded. Unicompartmental knee replacements have (1) a more specific indication, ie, unicompartmental tibiofemoral arthritis with minimal involvement of the patellofemoral, and (2) different patient demographics, primarily male population, low activity, minimal deformity, and good range of motion. Additionally, indications for unicompartmental replacements appear to be in a transition phase. Surgeons have only recently gained experience with this reportedly less invasive procedure. Thus it is too early to adequately assess outcomes. (NOTE: This criterion is taken from the AHRQ systematic review.)

## Appendix 2

### Databases Searched and Search Strategies

Search Strategies for Question #1

To obtain information for Question #1, we searched PubMed using the search strategies of the previous AHRQ report<sup>9</sup> on knee arthroplasty.

Search Strategies for Question #2

To identify studies for Question #2, we searched PubMed, EMBASE, and CINAHL. Our PubMed search strategies were: (“Sex Characteristics”[MeSH] OR “Sex Factors”[MeSH] OR gender[Text Word] OR “gender differences”[Text Word]) AND (“Arthroplasty, Replacement, Knee”[MeSH] OR “Knee Prosthesis”[MeSH] OR “knee replacement”[All Fields] OR “knee implant”[All Fields] OR (TKAR[All Fields] OR “prosthesis design”[MeSH Terms] AND (“knee”[MeSH Terms] OR “knee injuries”[MeSH Terms] OR “knee joint”[MeSH Terms]))) AND English[lang] AND “humans”[MeSH Terms].

This search identified 222 studies, none of which reported results of studies that employed gender-specific knees. Our search strategies for EMBASE were: (gender.mp. or “GENDER AND SEX”/) AND (knee replacement.mp. or Knee Arthroplasty/) limited to the English language. The search identified 37 studies, none of which was of gender-specific knee replacements.

Our search strategies for CINAHL were: (knee replacement.mp. or exp Arthroplasty, Replacement, Knee/) AND gender.mp.

The search identified 33 studies, none of which was of gender-specific knee replacements.

We also searched for ongoing and recently completed clinical studies at <http://www.clinicaltrials.gov/>. This search did not identify any studies on gender-specific knee replacements.

exclusion criteria, and then conducted systematic literature searches. Articles were included only if they met our a priori criteria. A level of evidence was assigned to each article included in this Overview.

### **Question #1: Do women have higher failure rates than men after traditional knee replacement surgery?**

To address this question, we performed a systematic review of the literature published after the issuance of an Agency for Healthcare Research and Quality (AHRQ) evidence report<sup>9</sup> that was commissioned by the National Institutes of Health

(NIH) in preparation for a Consensus Conference on Total Knee Replacement in December 2003. The AHRQ evidence report systematically reviewed the literature published between 1995 and April 2003. We replicated the search strategies used in the AHRQ report (except that our searches were for literature published between April 1, 2003, and November 2006), searched PubMed, and used article inclusion/exclusion criteria nearly identical to those in the AHRQ report (Appendix 1). The AHRQ systematic review concluded, “There is no evidence that age, gender, or obesity is a strong predictor of functional outcomes.”

Our searches identified 1,777 arti-

cles. Of these, 66 articles were retrieved as potentially meeting our inclusion criteria, and 24 were ultimately included. The data published subsequent to the AHRQ report do not consistently show differences between men and women in most of the outcomes of tricompartmental total knee replacement surgery. This is true regardless of whether a study examined revision rates, range of motion, and scores on several outcomes instruments, and it is true of the data reported in both studies that attempted to adjust for potential risk, and in non-risk-adjusted studies (Appendix 2). Possible exceptions to this are that women may have a longer length of stay and lower death

**Table 1****Gender-Related Results of Non-Risk-Adjusted Studies**

| Study                            | Year | Level of Evidence | n Females/<br>n Males | Max Follow-up Duration | Outcomes for Which Males and Females Not Significantly Different | Outcomes for Which Males and Females Significantly Different                                   |
|----------------------------------|------|-------------------|-----------------------|------------------------|------------------------------------------------------------------|------------------------------------------------------------------------------------------------|
| Brander et al <sup>10</sup>      | 2003 | III*              | 64/52                 | 12 mo                  | Postoperative pain                                               | —                                                                                              |
| Kennedy et al <sup>11</sup>      | 2003 | III               | 500/312               | 5 yr                   | Change in Knee Society Score                                     | —                                                                                              |
| Ritter et al <sup>12</sup>       | 2003 | III               | 2,798/1,954           | 7 yr                   | —                                                                | Females had less flexion                                                                       |
| Aderinto et al <sup>13</sup>     | 2004 | III               | 198/171               | 5 yr                   | Fixed flexion deformity <sup>†</sup>                             | —                                                                                              |
| Dalury and Jiranek <sup>14</sup> | 2004 | III               | 288/176               | 2 yr                   | Heterotopic ossification                                         | —                                                                                              |
| Kim et al <sup>15</sup>          | 2004 | III               | 644/337               | ?                      | Knee stiffness                                                   | —                                                                                              |
| Parvizi et al <sup>16</sup>      | 2004 | III               | 61/105                | 15.1 yr                | —                                                                | Females had lower revision rate                                                                |
| Wright et al <sup>17</sup>       | 2004 | III               | 138/60                | 11.7 yr                | Revision rate                                                    | —                                                                                              |
| Chatterji et al <sup>18</sup>    | 2005 | III               | 80/64                 | 1-2 yr                 | Oxford Knee Score<br>Change in sports activity                   | —                                                                                              |
| Laskin <sup>19*</sup>            | 2005 | III               | 59/41                 | 2.4 yr                 | Range of motion                                                  | —                                                                                              |
| Capeci et al <sup>20</sup>       | 2006 | III               | 129/124               | 34 mo                  | Femoral component asymmetry<br>Patellar component asymmetry      | Tibial component asymmetry different between genders, but direction of difference not reported |
| Meneghin et al <sup>21</sup>     | 2006 | III               | 439/281               | 5.1 yr                 | —                                                                | Females exhibited greater decrease in Insall-Salvati ratio                                     |
| Robertsson et al <sup>22</sup>   | 2006 | III               | ?                     | ?                      | Revision rate                                                    | —                                                                                              |
| Vessely et al <sup>23</sup>      | 2006 | III               | 384/361               | 15 yr                  | Revision rate                                                    | —                                                                                              |

\* The assigned levels of evidence are based on the levels for prognostic studies. All studies are level III because none was based on testing hypotheses developed a priori and because none adjusted for potentially important risk factors. All studies except the study by Brander et al<sup>10</sup> and the study by Dalury and Jiranek<sup>14</sup> were retrospective. Whether there was attrition in these two studies is not clear.

† Fixed flexion deformity was greater in males at 1 week postsurgery but not at other times.

rates than men, results that are consistent between the two studies that examined these outcomes. However, in general, published studies have not attempted to replicate the results of other published studies; none of the studies we included were specifically designed to evaluate gender differences, and they were not of high quality (Tables 1 and 2).

### **Question #2: Does gender-specific knee replacement increase the rates of successful knee replacement surgery in women?**

The searches that we constructed to address this question are described

in Appendix 2. These searches did not identify any clinical studies that directly addressed this question.

As noted above, this document is not intended to convey any official AAOS position on gender-specific knees. We provide this Technology Overview as a service to our members in an effort to help them identify and evaluate the available published literature on this topic. We hope that our summary will assist physicians in providing the best possible care to their patients.

AAOS would like to have feedback from its members on this Technology Overview. To provide your feedback, please visit [http://](http://research.aaos.org/surveys/Tech-Fee)

[research.aaos.org/surveys/Tech-Fee](http://research.aaos.org/surveys/Tech-Fee) [dback.htm](http://research.aaos.org/surveys/Tech-Fee).

### **Additional Criteria for Question #1**

1. Study must be published after April 2003. This cutoff date was used because we updated the searches described in the AHRQ evidence report.

2. Study must examine more than 100 knees.

3. Studies may be either experimental (RCTs) or quasi-experimental (non-randomized, controlled studies; before-and-after studies).

### **Additional Criteria for Question #2:**

1. Include any study of any design

**Table 2****Gender-Related Results of Risk-Adjusted Studies**

| Study                            | Year | Level of Evidence | n<br>Females/n<br>Males | Max<br>Follow-up<br>Duration | Risk Factor<br>Adjusted for                                                                                                                         | Outcomes for Which<br>Males and Females not<br>Significantly Different | Outcomes for Which<br>Males and Females<br>Significantly Different                                                                                                                 |
|----------------------------------|------|-------------------|-------------------------|------------------------------|-----------------------------------------------------------------------------------------------------------------------------------------------------|------------------------------------------------------------------------|------------------------------------------------------------------------------------------------------------------------------------------------------------------------------------|
| Jones<br>et al <sup>24</sup>     | 2003 | III               | 162/114                 | 6 mo                         | Age, comorbidities,<br>preoperative use of<br>walking device                                                                                        | Postsurgical WOMAC<br>scores, postsurgical<br>SF-36 scores             | —                                                                                                                                                                                  |
| Weaver<br>et al <sup>25</sup>    | 2003 | III               | 371/<br>11,339          | 30 d                         | Age, race, comorbidities,<br>Medicaid or VA<br>supplementation,<br>surgery duration                                                                 | —                                                                      | Females had more<br>complications, longer<br>length of stay                                                                                                                        |
| Fehring<br>et al <sup>26</sup>   | 2004 | III               | 1,110/<br>627           | 13 yr                        | Age, device-related<br>variables, side of<br>surgery                                                                                                | —                                                                      | Females had lower<br>rates of wear-related<br>failure                                                                                                                              |
| Gatha<br>et al <sup>27</sup>     | 2004 | III               | 80/55                   | ?                            | Age, device-related<br>variables, preoperative<br>knee mobility/function                                                                            | Range of motion                                                        | —                                                                                                                                                                                  |
| Harrysson<br>et al <sup>28</sup> | 2004 | III               | 30,523/<br>15,434       | 9 yr                         | Age, year of surgery,<br>diagnosis                                                                                                                  | Implant removal (for<br>any reason), revision<br>due to loosening      | —                                                                                                                                                                                  |
| Mahomed<br>et al <sup>29</sup>   | 2004 | III               | 82,780/<br>42,206       | 90 d                         | Age, race, comorbidities,<br>Medicaid or VA<br>supplementation,<br>geographic region,<br>surgical or hospital<br>volume, diagnosis                  | Manipulation under<br>anesthesia,<br>pulmonary<br>embolism,            | Females had fewer<br>myocardial<br>infarctions, lower<br>pneumonia rates,<br>lower rates of knee<br>infection, lower<br>additional knee<br>surgery rates, and<br>lower death rates |
| Wright<br>et al <sup>17</sup>    | 2004 | III               | 138/60                  | 11.7 yr                      | Age, BMI, diagnosis                                                                                                                                 | Knee revisions                                                         | —                                                                                                                                                                                  |
| Himanen<br>et al <sup>30</sup>   | 2005 | III               | 5,623/<br>1,586         | 10 yr                        | Age, cementing, year of<br>surgery, diagnosis                                                                                                       | —                                                                      | Females had lower<br>rates of revision due<br>to loosening                                                                                                                         |
| Solomon<br>et al <sup>31</sup>   | 2006 | III               | 6,252/<br>2,821         | 90 d                         | Age, surgical or hospital<br>volume, hospital<br>teaching status, % of<br>patients receiving<br>surgery in a dedicated<br>operating room            | —                                                                      | Females had lower<br>combined rate of pul-<br>monary embolism +<br>myocardial infarction<br>+ pneumonia + knee<br>infection + death                                                |
| Vessely<br>et al <sup>23</sup>   | 2006 | III               | 384/361                 | 15 yr                        | Age, BMI, device-related<br>variables, diagnosis                                                                                                    | Implant removal (for<br>any reason)                                    | —                                                                                                                                                                                  |
| Vincent<br>et al <sup>32</sup>   | 2006 | III               | ? (Total,<br>268)       | In hos-<br>pital<br>(?)      | Age                                                                                                                                                 | Functional<br>Independent<br>Motor (FIM) <sup>†</sup>                  | Females had longer<br>length of stay, higher<br>hospital rehabilitation<br>charges                                                                                                 |
| SooHoo<br>et al <sup>33</sup>    | 2007 | III               | 138,064/<br>84,620      | 90 d                         | Age, race, comorbidities,<br>Medicaid or VA supple-<br>mentation, surgical or<br>hospital volume, hospi-<br>tal size, hospital teach-<br>ing status | Pulmonary embolism                                                     | Females had higher<br>rates of knee infection<br>and lower death rates                                                                                                             |

\* The assigned levels of evidence are based on the levels for prognostic studies. All studies are level III because none was based on testing hypotheses developed a priori. There is, therefore, a potential for type I errors. All studies except the study by Jones et al<sup>24</sup> were retrospective. Whether there was attrition in this study is not clear. None of the studies attempted to validate the regression models on which they reported.

†The FIM Score “estimates performance during tasks that can be broadly categorized as activities of daily living, mobility, and cognitive domains.”

BMI = body mass index, SF-36 = Short Form 36, VA = Veterans Administration, WOMAC = Western Ontario and McMaster Universities

that examined 10 or more knees. (This criterion is less restrictive than the analogous criterion for Question 1.)

2. No restriction on outcome. May be either intermediate or patient-oriented.

## References

- Woodland LH, Francis RS: Parameters and comparisons of the quadriceps angle of college-aged men and women in the supine and standing positions. *Am J Sports Med* 1992;20:208-211.
- Poivache PL, Insall JN, Scuderi GR, Font-Rodriguez DE: Rotational landmarks and sizing of the distal femur in total knee arthroplasty. *Clin Orthop Relat Res* 1996;331:35-46.
- Chin KR, Dalury DF, Zurawski D, Scott RD: Intraoperative measurements of male and female distal femurs during primary total knee arthroplasty. *J Knee Surg* 2002;15:213-217.
- Hitt K, Shurman JR, Greene K, et al: Anthropometric measurements of the human knee: Correlation to the sizing of current knee arthroplasty systems. *J Bone Joint Surg Am* 2003;85-A(Suppl 4):115-122.
- Aglietti P, Insall JN, Cerulli G: Patellar pain and incongruence: I: Measurements of incongruence. *Clin Orthop Relat Res* 1983;176:217-224.
- Livingston LA: The quadriceps angle: a review of the literature. *J Orthop Sports Phys Ther* 1998;28:105-109.
- Grelsamer RP, Dubey A, Weinstein CH: Men and women have similar Q angles: A clinical and trigonometric evaluation. *J Bone Joint Surg Br* 2005;87:1498-1501.
- Csintalan RP, Schulz MM, Woo J, McMahon PJ, Lee TQ: Gender differences in patellofemoral joint biomechanics. *Clin Orthop Relat Res* 2002;402:260-269.
- Kane RL, Saleh KJ, Wilt TJ, Bershadsky B, Cross WW III, MacDonald RM: Total knee replacement: Evidence report/technology assessment no. 86 (Prepared by Minnesota Evidence-based Practice Center, Minneapolis, Minnesota). *AHRQ Publication No 04-E006-1*. Rockville, MD, Agency for Healthcare Research and Quality, 2003.
- Brander VA, Stulberg SD, Adams AD, et al: Predicting total knee replacement pain: A prospective, observational study. *Clin Orthop Relat Res* 2003;416:27-36.
- Kennedy LG, Newman JH, Ackroyd CE, Dieppe PA: When should we do knee replacements? *Knee* 2003;10:161-166.
- Ritter MA, Harty LD, Davis KE, Meding JB, Berend ME: Predicting range of motion after total knee arthroplasty: Clustering, log-linear regression, and regression tree analysis. *J Bone Joint Surg Am* 2003;85-A:1278-1285.
- Aderinto J, Brenkel IJ, Chan P: Natural history of fixed flexion deformity following total knee replacement: A prospective five-year study. *J Bone Joint Surg Br* 2005;87:934-936.
- Dalury DF, Jiranek WA: The incidence of heterotopic ossification after total knee arthroplasty. *J Arthroplasty* 2004;19:447-452.
- Kim J, Nelson CL, Lotke PA: Stiffness after total knee arthroplasty: Prevalence of the complication and outcomes of revision. *J Bone Joint Surg Am* 2004;86-A:1479-1484.
- Parvizi J, Hanssen AD, Spangehl MJ: Total knee arthroplasty following proximal tibial osteotomy: Risk factors for failure. *J Bone Joint Surg Am* 2004;86-A:474-479.
- Wright RJ, Sledge CB, Poss R, Ewald FC, Walsh ME, Lingard EA: Patient-reported outcome and survivorship after Kinemax total knee arthroplasty. *J Bone Joint Surg Am* 2004;86:2464-2470.
- Chatterji U, Ashworth MJ, Lewis PL, Dobson PJ: Effect of total knee arthroplasty on recreational and sporting activity. *ANZ J Surg* 2005;75:405-408.
- Laskin RS: Minimally invasive total knee arthroplasty: The results justify its use. *Clin Orthop Relat Res* 2005;440:54-59.
- Capeci CM, Brown EC III, Scuderi GR, Scott WN: Component asymmetry in simultaneous bilateral total knee arthroplasty. *J Arthroplasty* 2006;21:749-753.
- Meneghini RM, Ritter MA, Pierson JL, Meding JB, Berend ME, Faris PM: The effect of the Insall-Salvati ratio on outcome after total knee arthroplasty. *J Arthroplasty* 2006;21(6, Suppl 2) 116-120.
- Robertsson O, Ranstam J, Lidgren L: Variation in outcome and ranking of hospitals: An analysis from the Swedish knee arthroplasty register. *Acta Orthop* 2006;77:487-493.
- Vessely MB, Whaley AL, Harmsen WS, Schleck CD, Berry DJ: The Chitranjan Ranawat Award: Long-term survivorship and failure modes of 1000 cemented condylar total knee arthroplasties. *Clin Orthop Relat Res* 2006;452:28-34.
- Jones CA, Voaklander DC, Suarez-Alma ME: Determinants of function after total knee arthroplasty. *Phys Ther* 2003;83:696-706.
- Weaver F, Hynes D, Hopkinson W, et al: Preoperative risks and outcomes of hip and knee arthroplasty in the Veterans Health Administration. *J Arthroplasty* 2003;18:693-708.
- Fehring TK, Murphy JA, Hayes TD, Roberts DW, Pomeroy DL, Griffin WL: Factors influencing wear and osteolysis in press-fit condylar modular total knee replacements. *Clin Orthop Relat Res* 2004;428:40-50.
- Gatha NM, Clarke HD, Fuchs R, Scuderi GR, Insall JN: Factors affecting postoperative range of motion after total knee arthroplasty. *J Knee Surg* 2004;17:196-202.
- Harrysson OL, Robertsson O, Nayfeh JF: Higher cumulative revision rate of knee arthroplasties in younger patients with osteoarthritis. *Clin Orthop Relat Res* 2004;421:162-168.
- Mahomed NN, Barrett J, Katz JN, Baron JA, Wright J, Losina E: Epidemiology of total knee replacement in the United States Medicare population. *J Bone Joint Surg Am* 2005;87:1222-1228.
- Himanen AK, Belt E, Nevalainen J, Hamalainen M, Lehto MU: Survival of the AGC total knee arthroplasty is similar for arthrosis and rheumatoid arthritis. Finnish Arthroplasty Register report on 8,467 operations carried out between 1985 and 1999. *Acta Orthop* 2005;76:85-88.
- Solomon DH, Chibnik LB, Losina E, et al: Development of a preliminary index that predicts adverse events after total knee replacement. *Arthritis Rheum* 2006;54:1536-1542.
- Vincent KR, Vincent HK, Lee LW, Alfano AP: Outcomes in total knee arthroplasty patients after inpatient rehabilitation: Influence of age and gender. *Am J Phys Med Rehabil* 2006;85:482-489.
- Soohoo NF, Lieberman JR, Ko CY, Zingmond DS: Factors predicting complication rates following total knee replacement. *J Bone Joint Surg Am* 2006;88:480-485.
